# Supplementary material for: In-situ incubation of a coral patch for community-scale assessment of metabolic and chemical processes on a reef slope
Source: PeerJ journal article supplement (doi:10.7717/peerj.5966), 2018-12-03

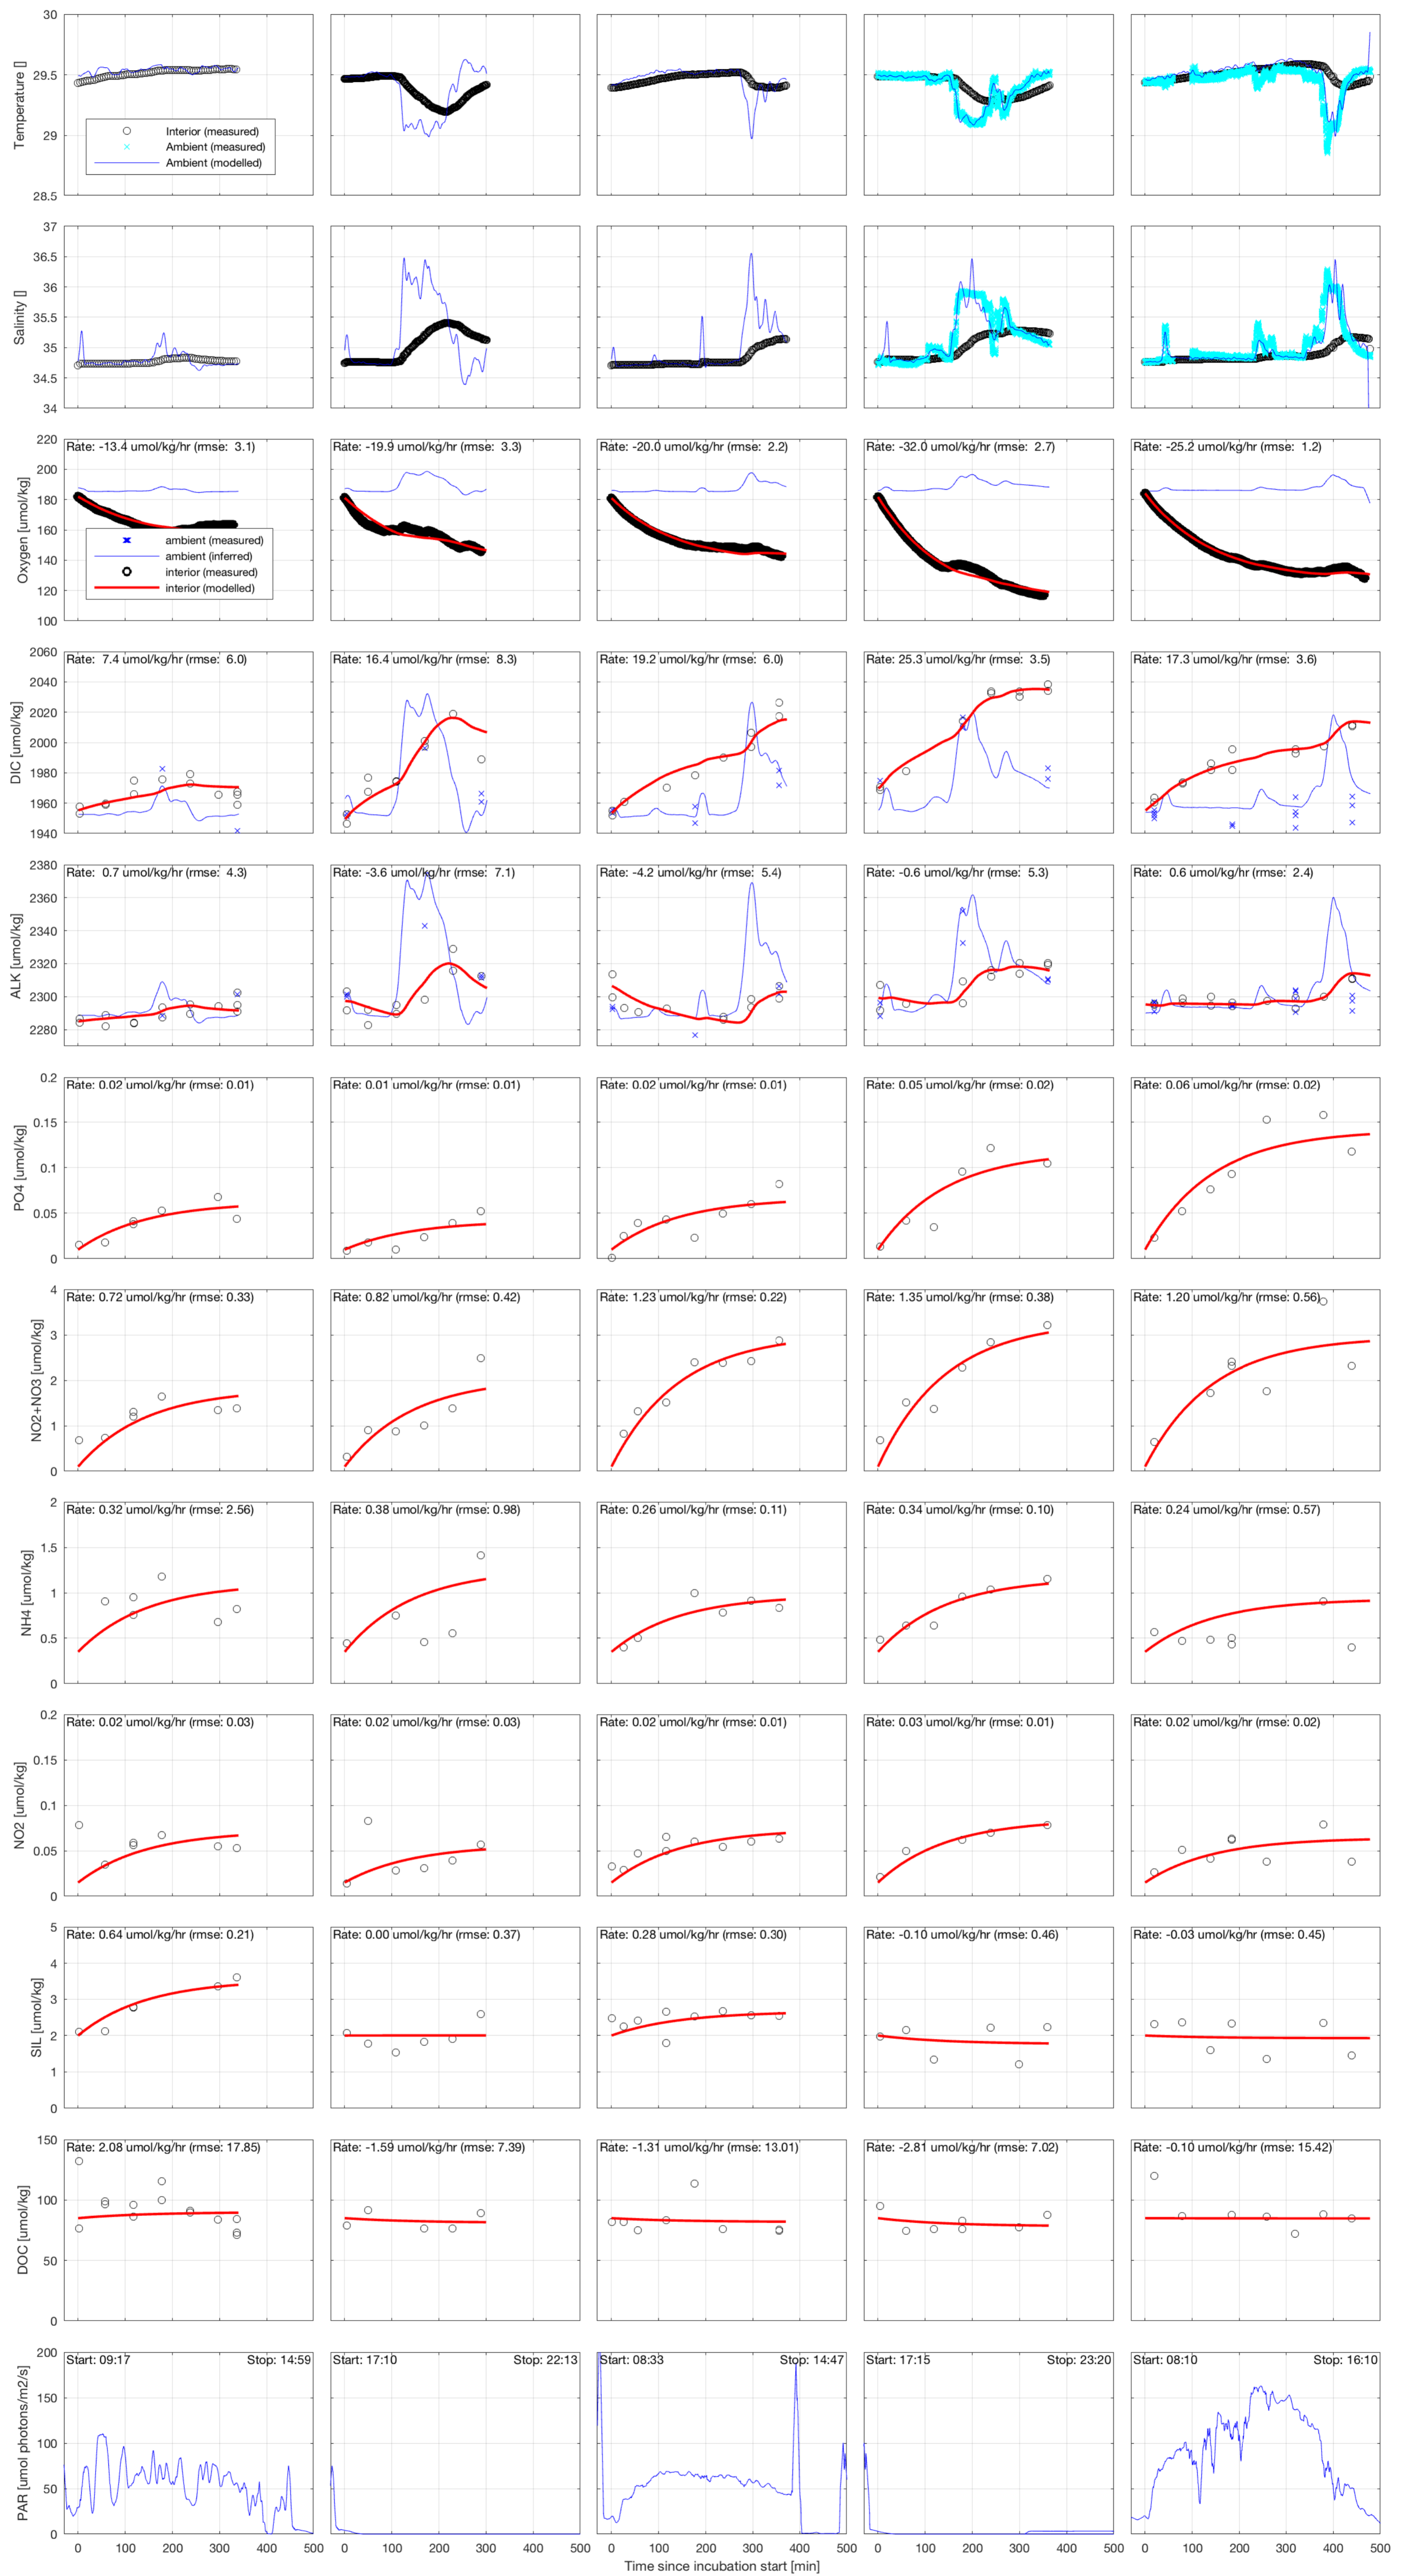

Supplement: Figure_S3.pdf [file Figure_S3.pdf]
